# Supplementary material for: Globular Adiponectin Inhibits Breast Cancer Cell Growth through Modulation of Inflammasome Activation: Critical Role of Sestrin2 and AMPK Signaling
Source: PubMed Central journal article supplement (PMC7139717; doi:10.3390/cancers12030613), 2020-03-06
Supplement: cancers-12-00613-s001.pdf [file cancers-12-00613-s001.pdf]

# Globular Adiponectin Inhibits Breast Cancer Cell Growth through Modulation of Inflammasomes Activation: Critical Role of Sestrin2 and AMPK Signaling

Duc-Vinh Pham, Pawan Kumar Raut, Mahesh Pandit, Jae-Hoon Chang, Nikita Katila, Dong-Young Choi, Jee-Heon Jeong and Pil-Hoon Park

## Supplementary Materials

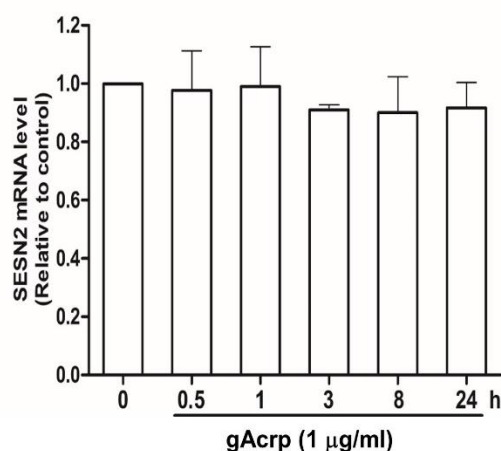

**Figure S1.** Effect of globular adiponectin on SESN2 mRNA expression level in breast cancer cells. MCF-7 cells were treated with gAcrp (1 µg/mL) for indicated time periods. Sestrin2 mRNA levels were determined by qT-PCR analysis.

Figure S2

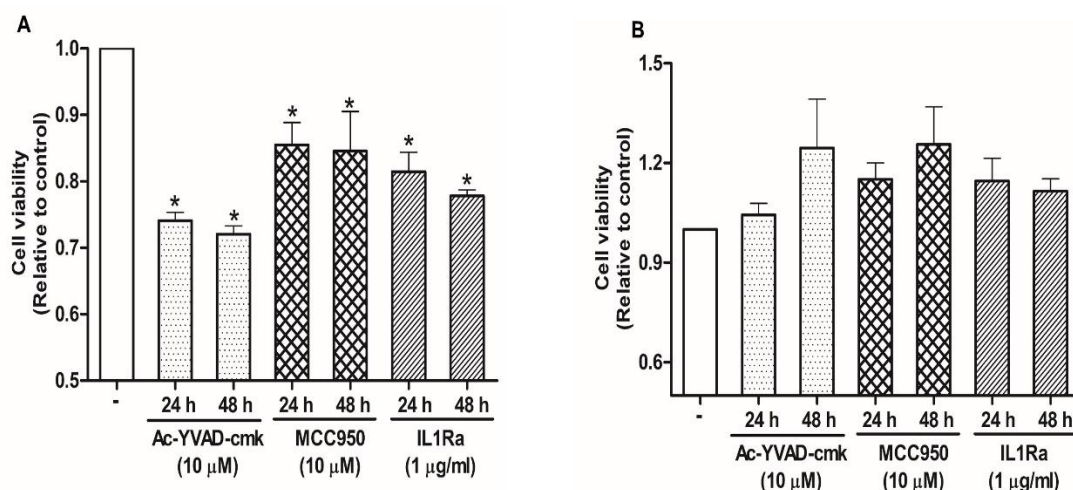

**Figure S2.** Effect of inflammasomes inhibitors on the viability of breast cancer cells. T47D cells (A) or MDA-MB-231 cells (B) were treated with Ac-YVAD-cmk, MCC950, or IL-1Ra for indicated time durations. Cell viability was determined by MTS assay.

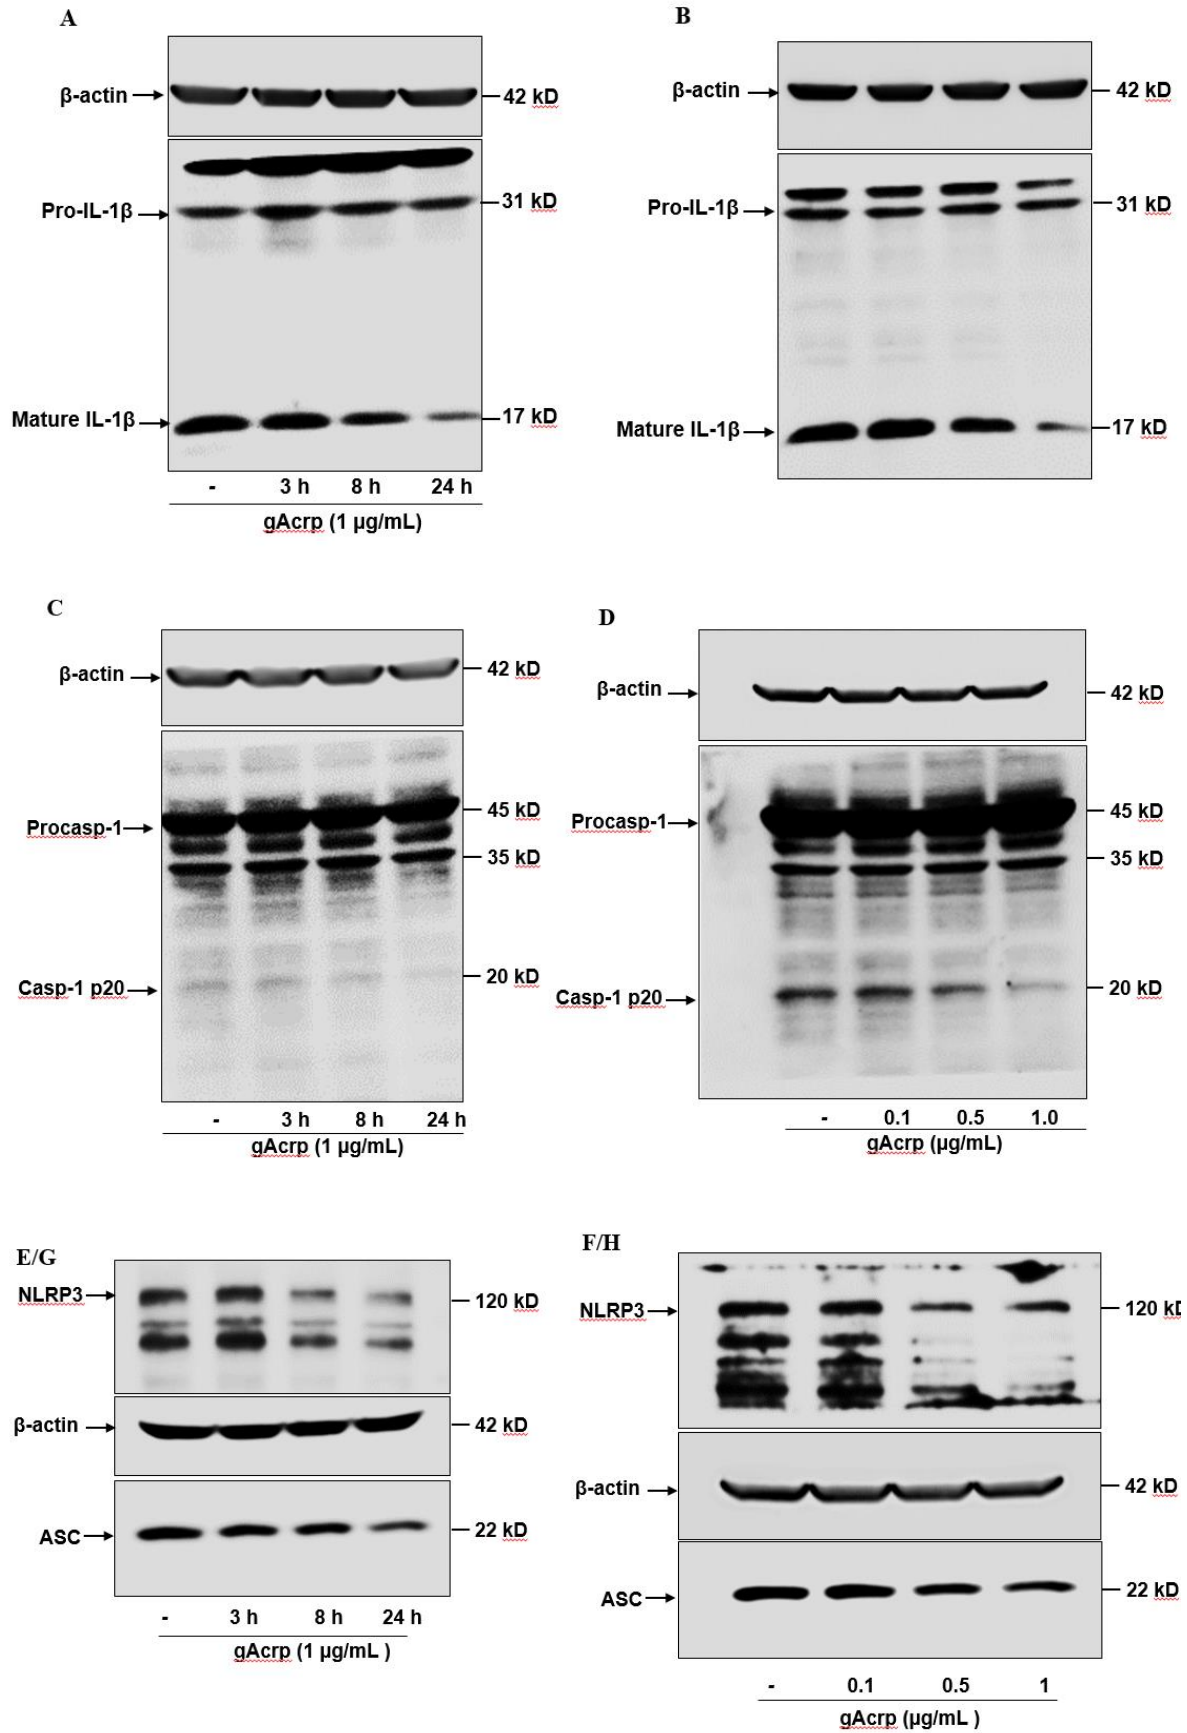

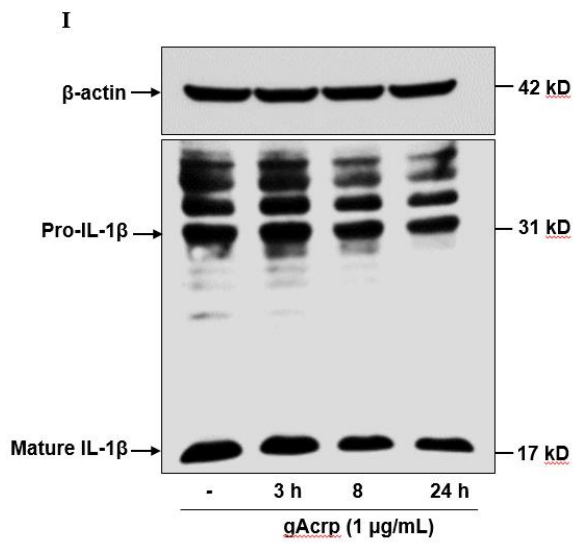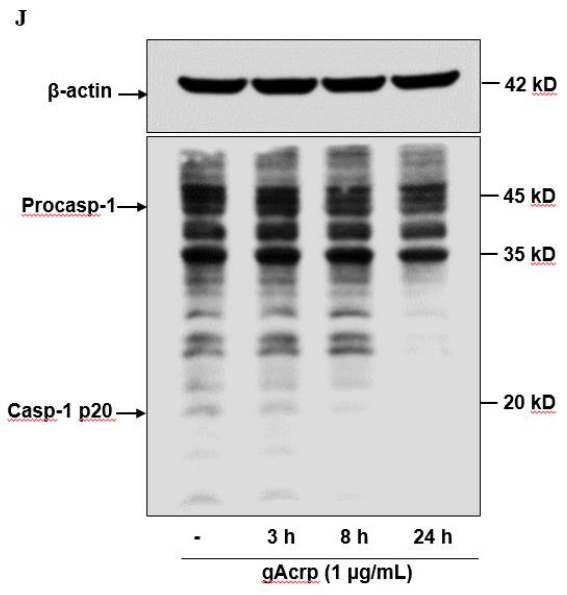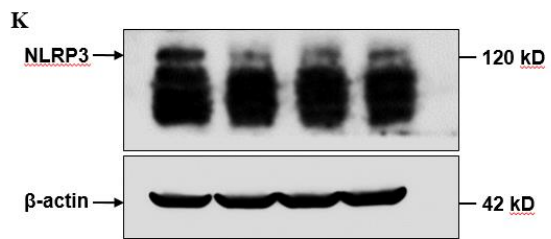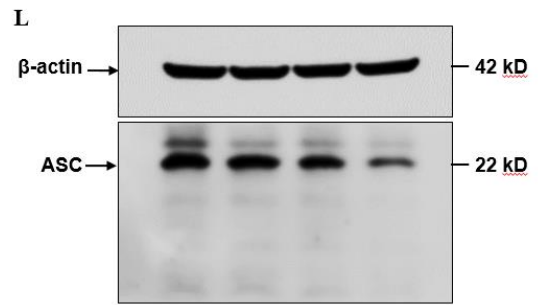

Whole Western blots for Figure 2

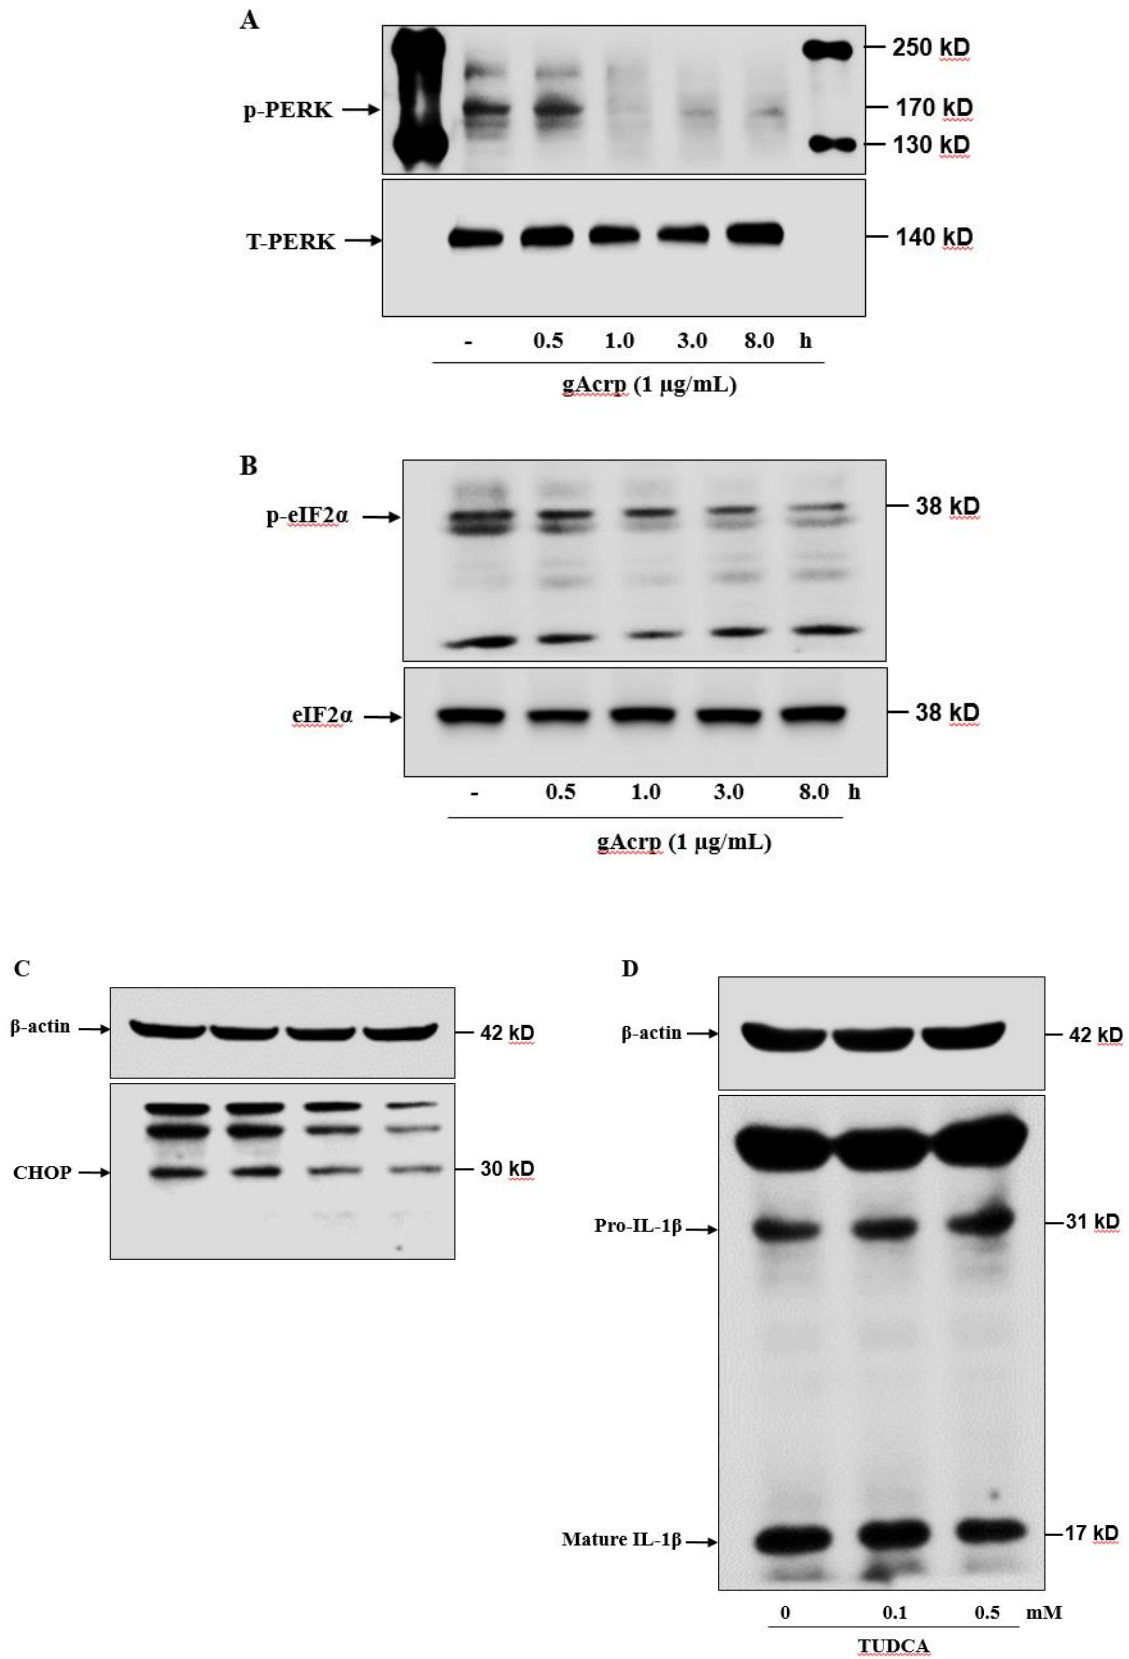

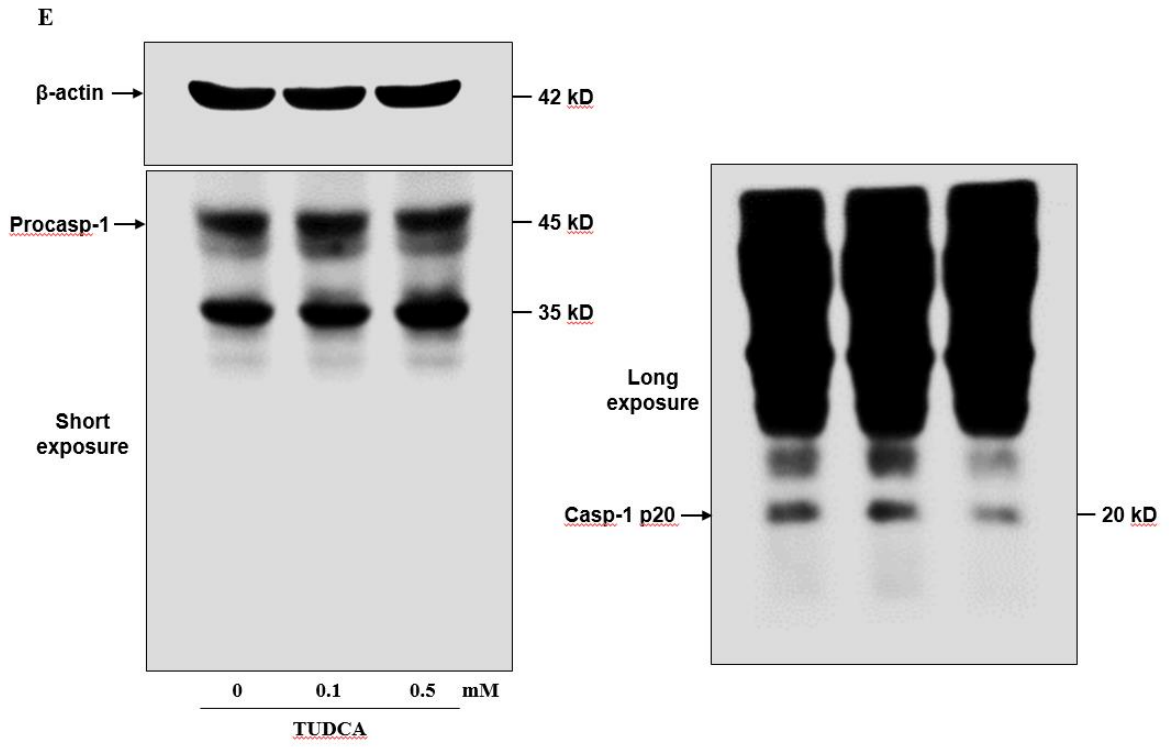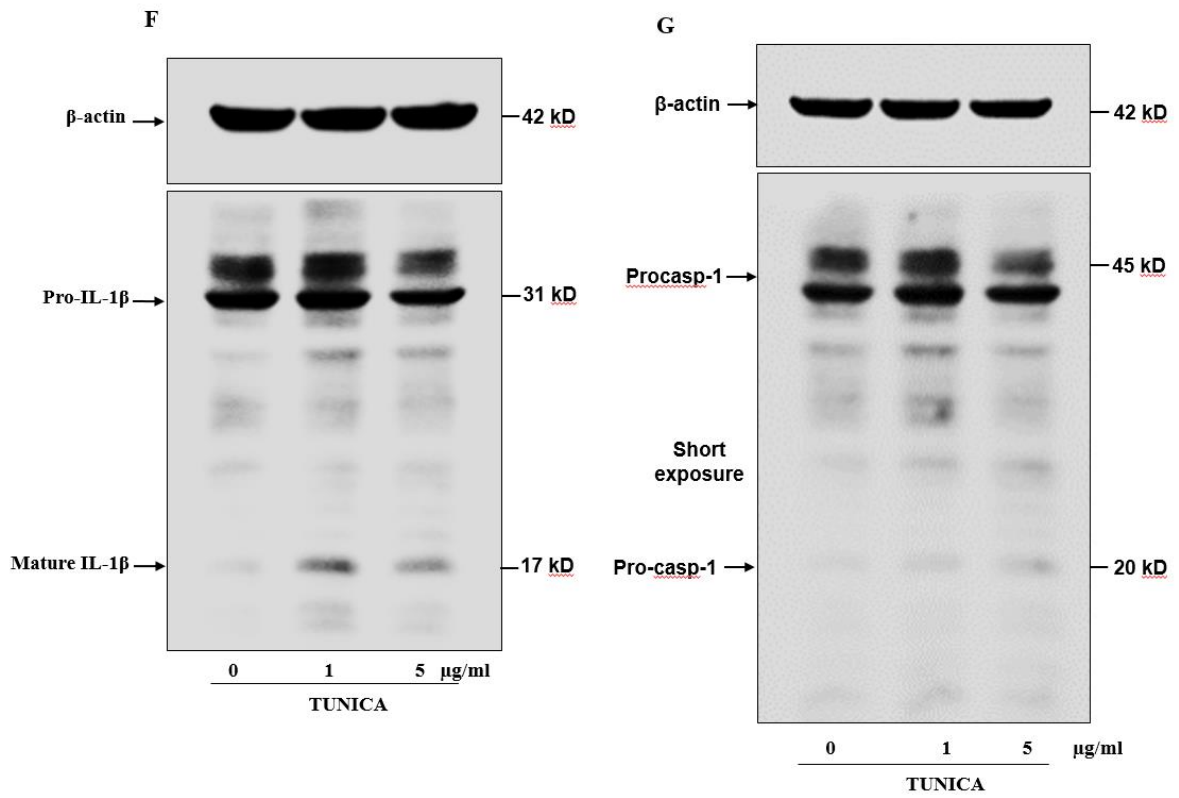

Whole Western blots for Figure 3

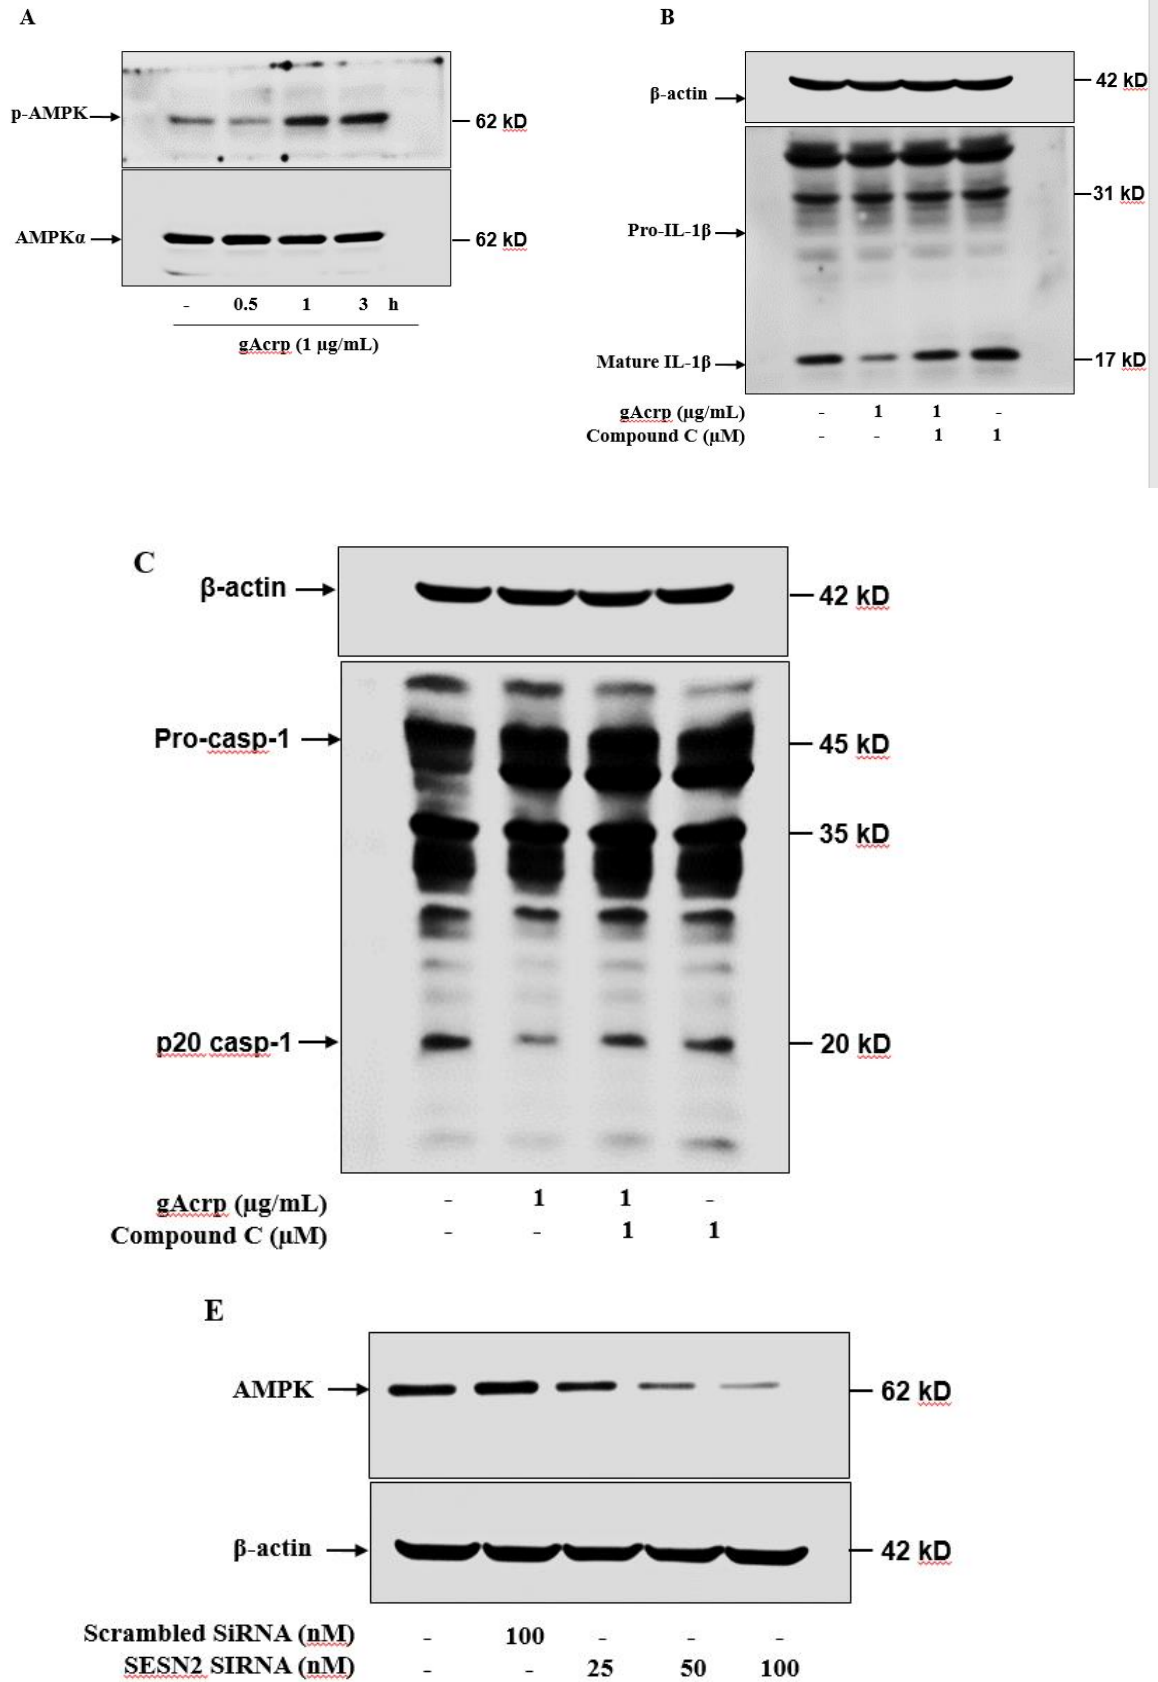

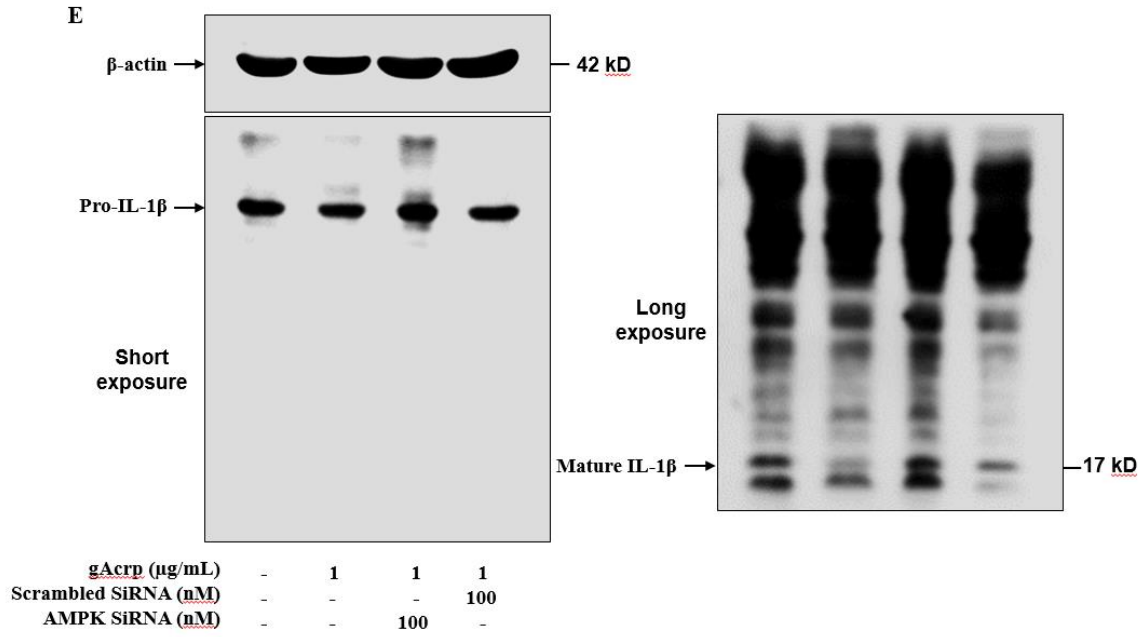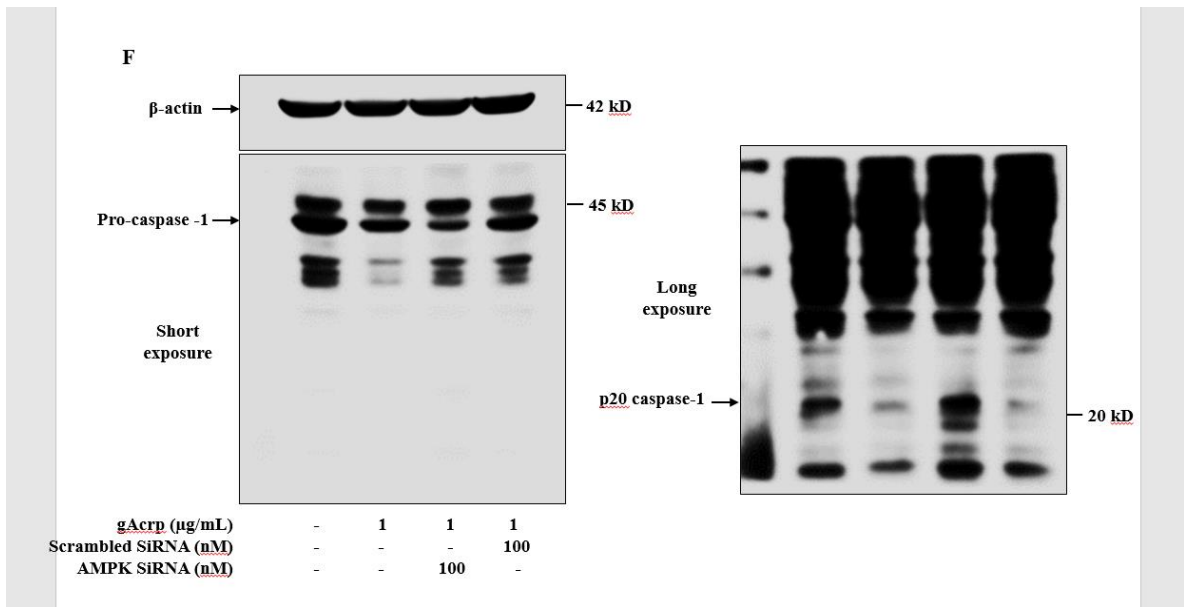

**G**

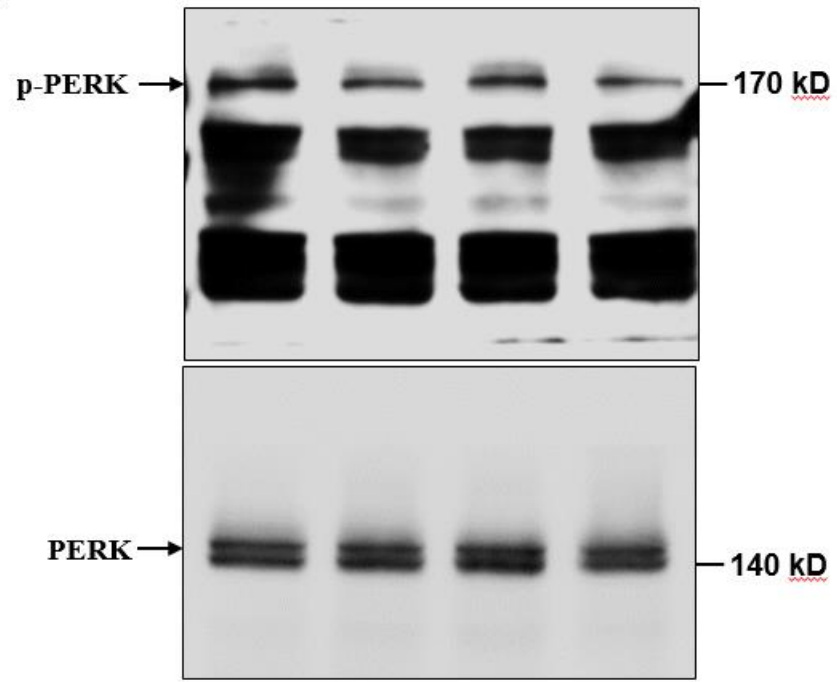

|                                            |   |   |     |     |
|--------------------------------------------|---|---|-----|-----|
| <b>gAcrp (<math>\mu\text{g/mL}</math>)</b> | - | 1 | 1   | 1   |
| <b>Scrambled SiRNA (nM)</b>                | - | - | -   | 100 |
| <b>AMPK SiRNA (nM)</b>                     | - | - | 100 | -   |



**H**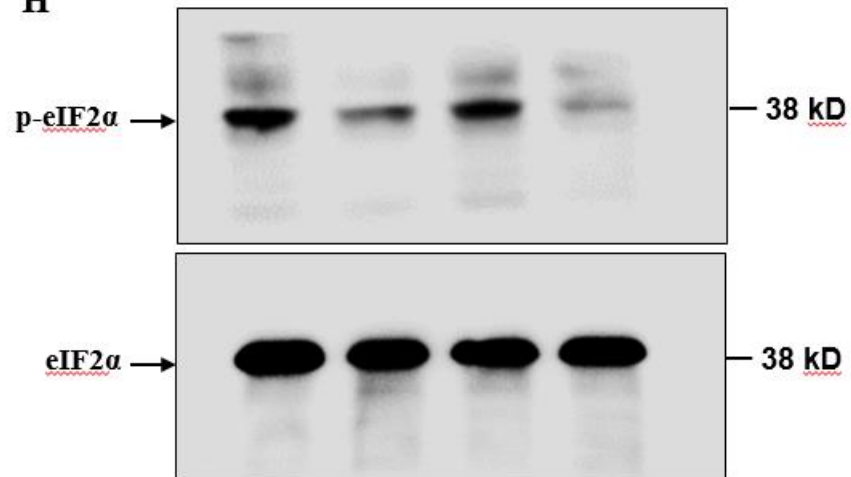

|                                     |   |   |     |     |
|-------------------------------------|---|---|-----|-----|
| <b>gAcrp (<math>\mu</math>g/mL)</b> | - | 1 | 1   | 1   |
| <b>Scrambled SiRNA (nM)</b>         | - | - | -   | 100 |
| <b>AMPK SiRNA (nM)</b>              | - | - | 100 | -   |

**I**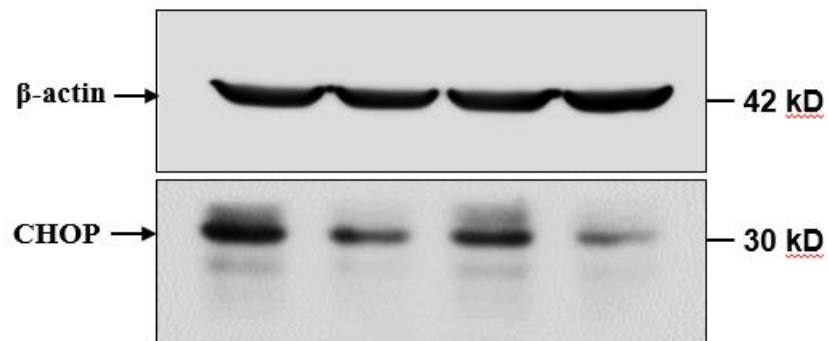

|                                     |   |   |     |     |
|-------------------------------------|---|---|-----|-----|
| <b>gAcrp (<math>\mu</math>g/mL)</b> | - | 1 | 1   | 1   |
| <b>Scrambled SiRNA (nM)</b>         | - | - | -   | 100 |
| <b>AMPK SiRNA (nM)</b>              | - | - | 100 | -   |

Whole Western blots for Figure 4

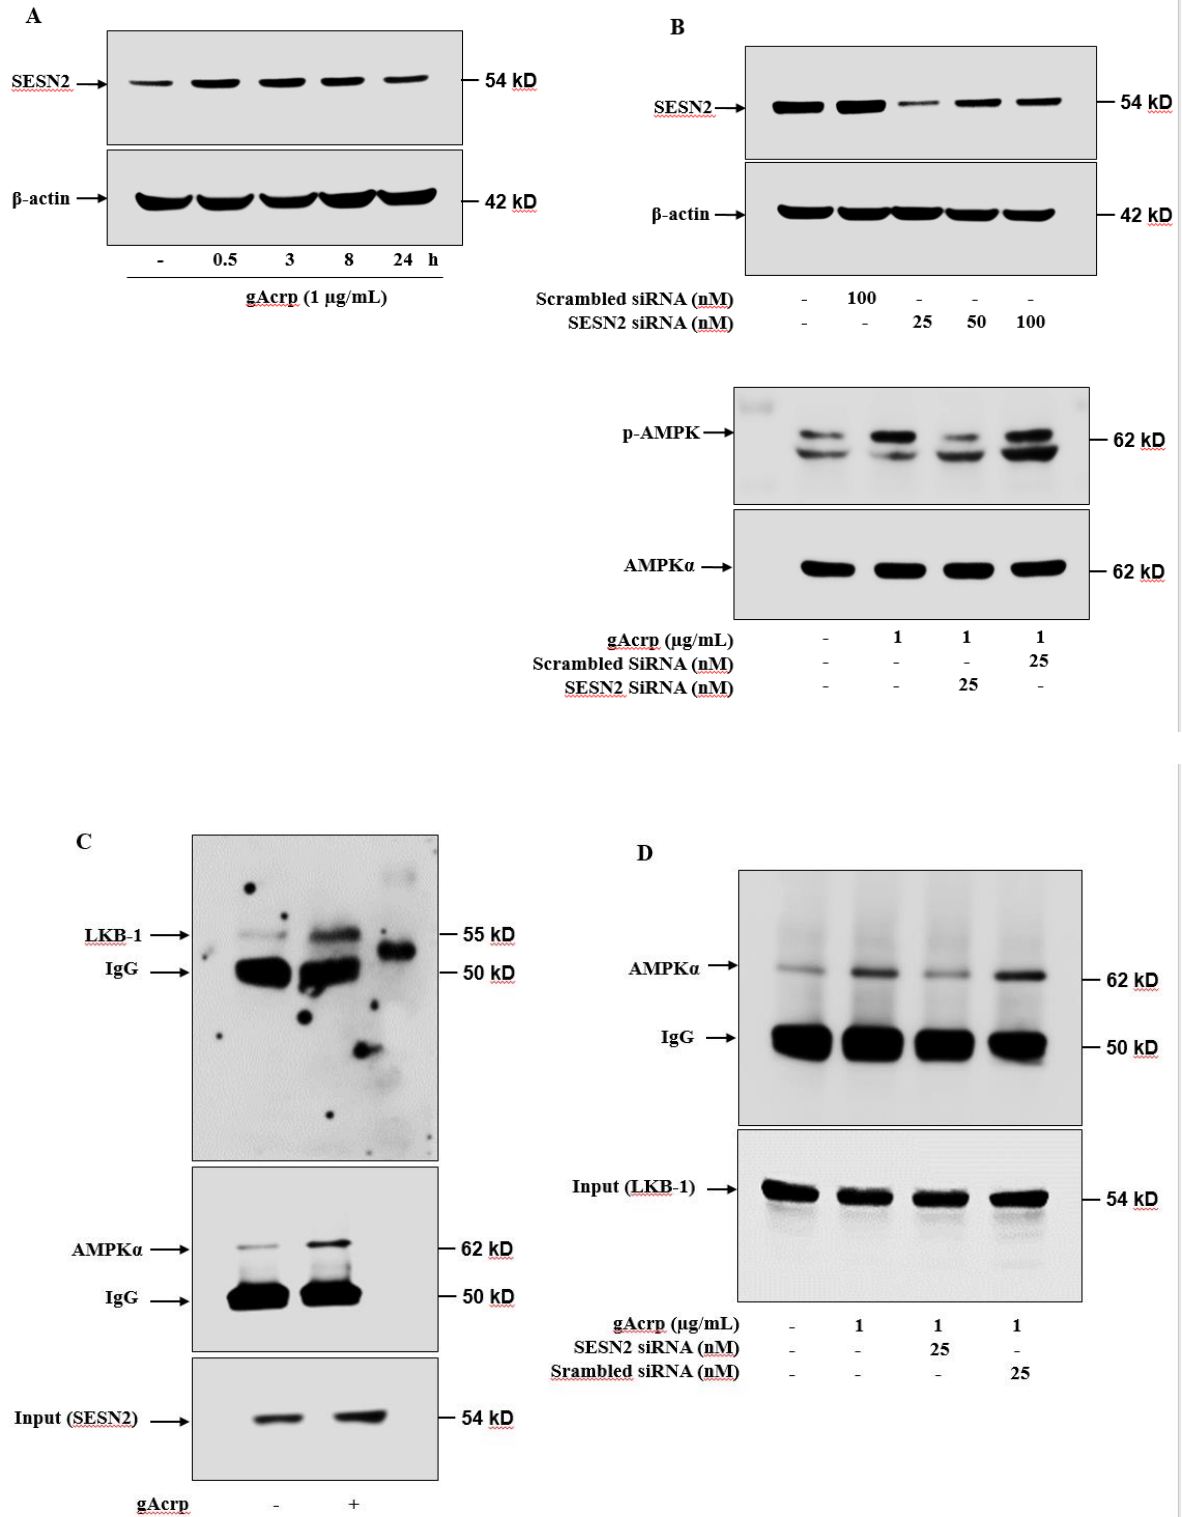

**E**

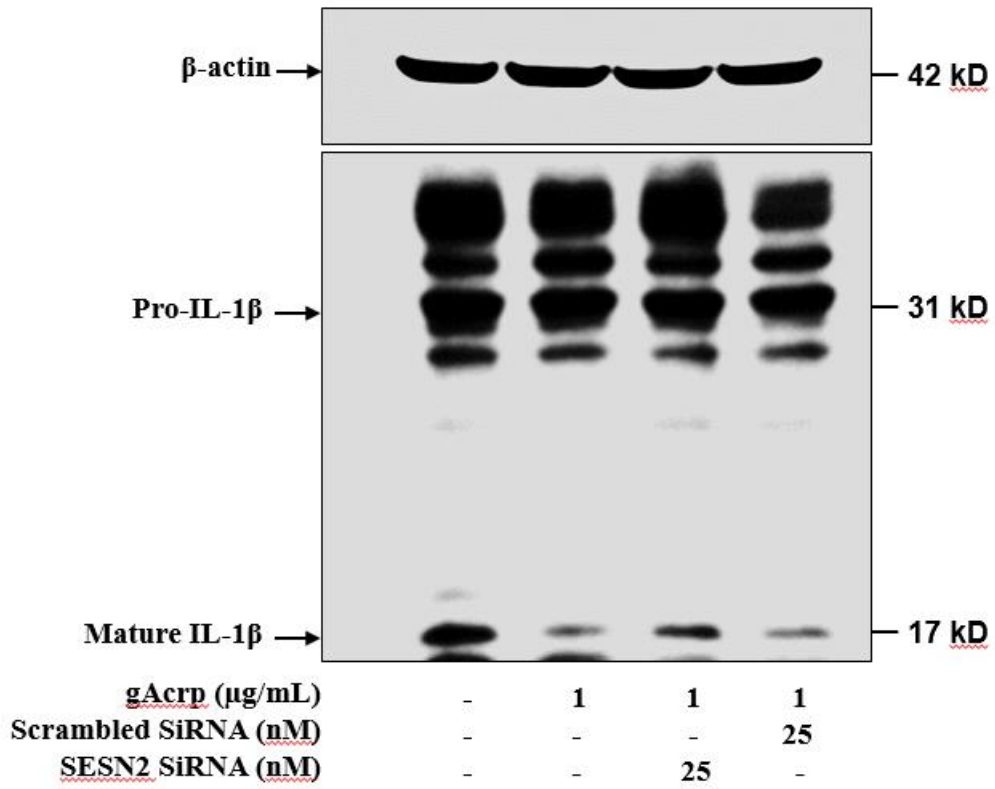

**F**

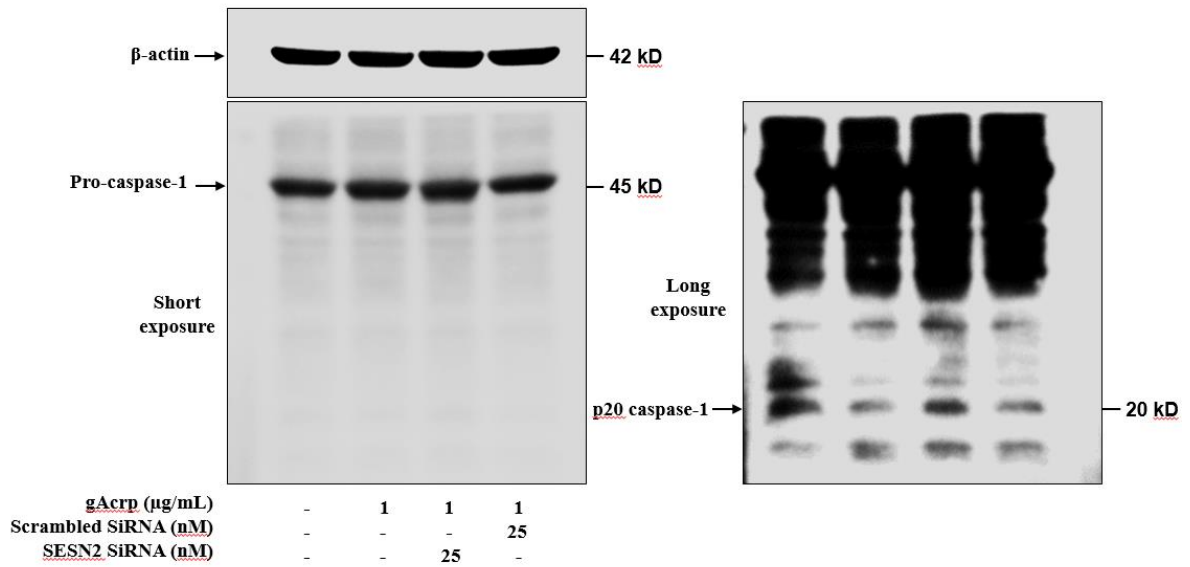

**G**

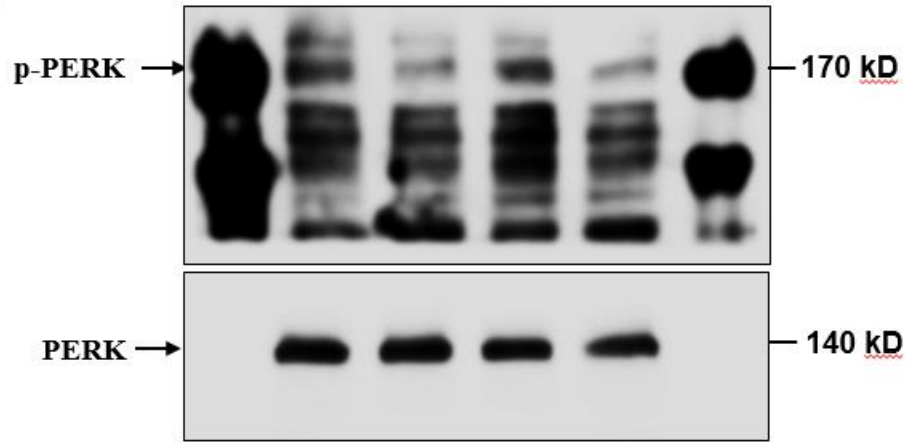

|                             |   |   |    |    |
|-----------------------------|---|---|----|----|
| <b>gAcrp (μg/mL)</b>        | - | 1 | 1  | 1  |
| <b>Scrambled SiRNA (nM)</b> | - | - | -  | 25 |
| <b>SESN2 SiRNA (nM)</b>     | - | - | 25 | -  |

**H**

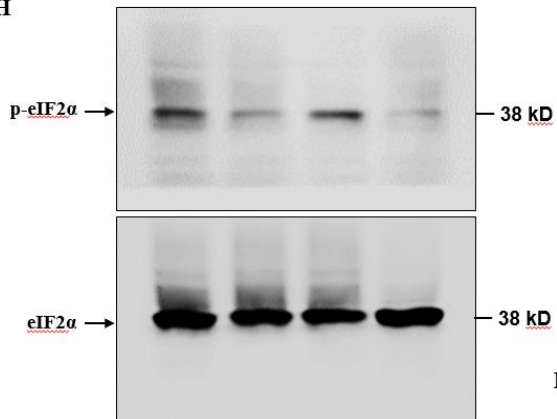

|                             |   |   |    |    |
|-----------------------------|---|---|----|----|
| <b>gAcrp (μg/mL)</b>        | - | 1 | 1  | 1  |
| <b>Scrambled SiRNA (nM)</b> | - | - | -  | 25 |
| <b>SESN2 SiRNA (nM)</b>     | - | - | 25 | -  |

**I**

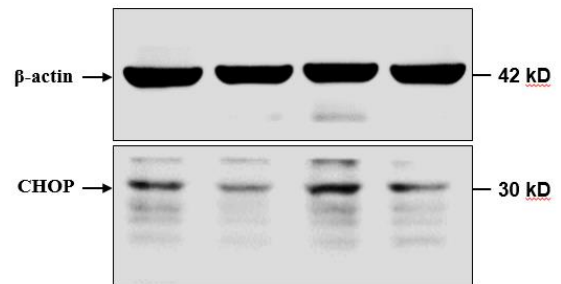

|                             |   |   |    |    |
|-----------------------------|---|---|----|----|
| <b>gAcrp (μg/mL)</b>        | - | 1 | 1  | 1  |
| <b>Scrambled SiRNA (nM)</b> | - | - | -  | 25 |
| <b>SESN2 SiRNA (nM)</b>     | - | - | 25 | -  |

Whole Western blots for Figure 5

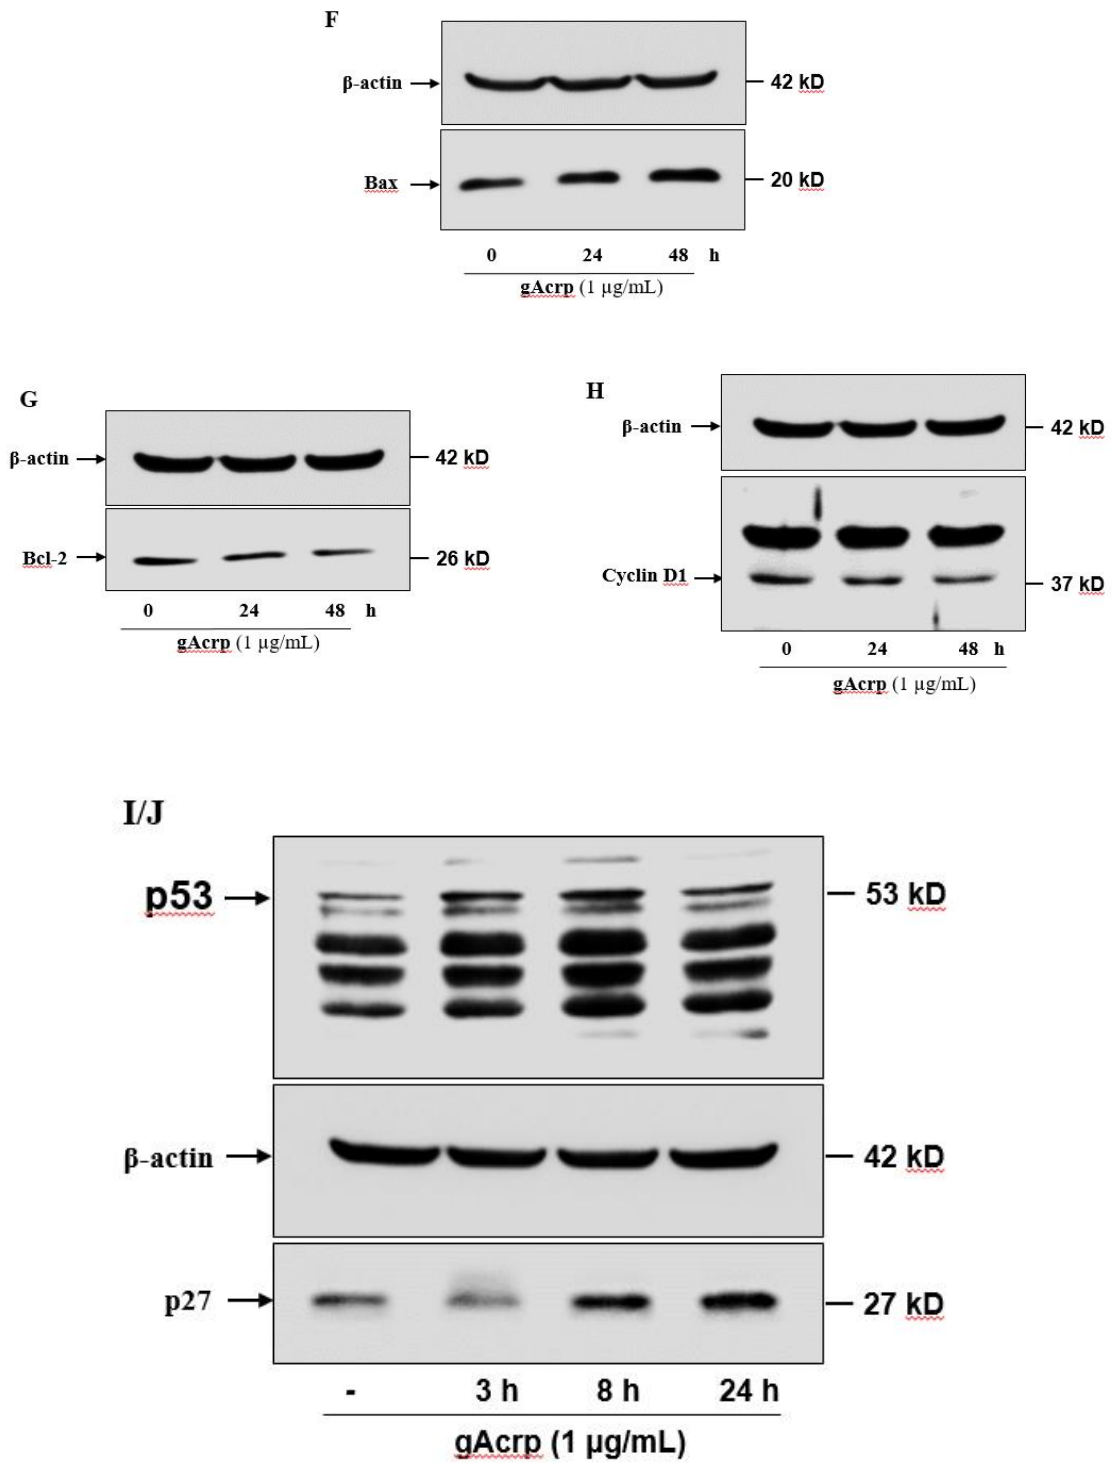

**K**

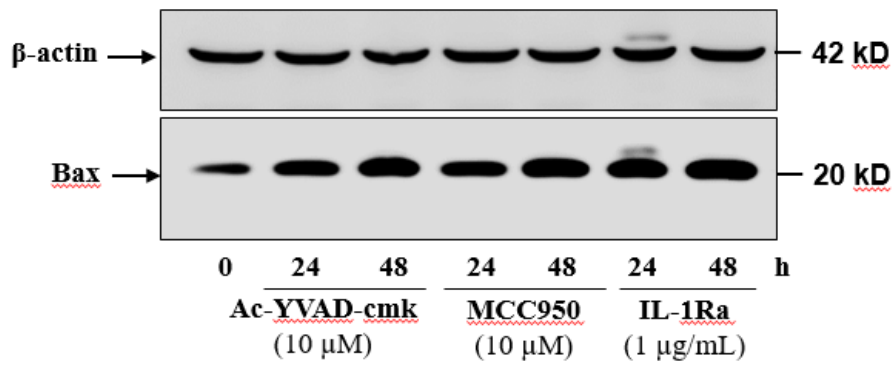

**L**

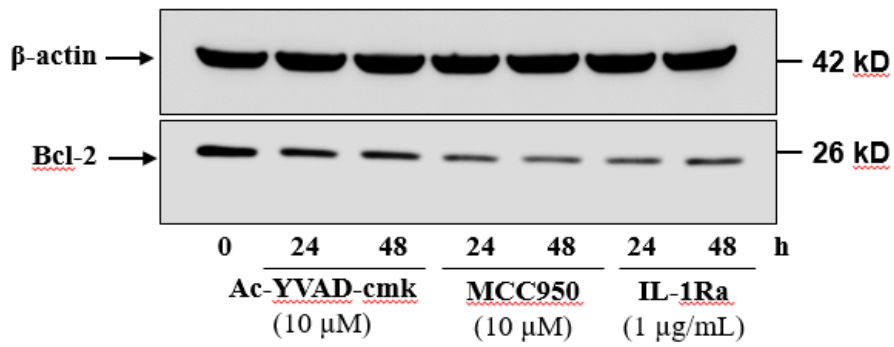

**M**

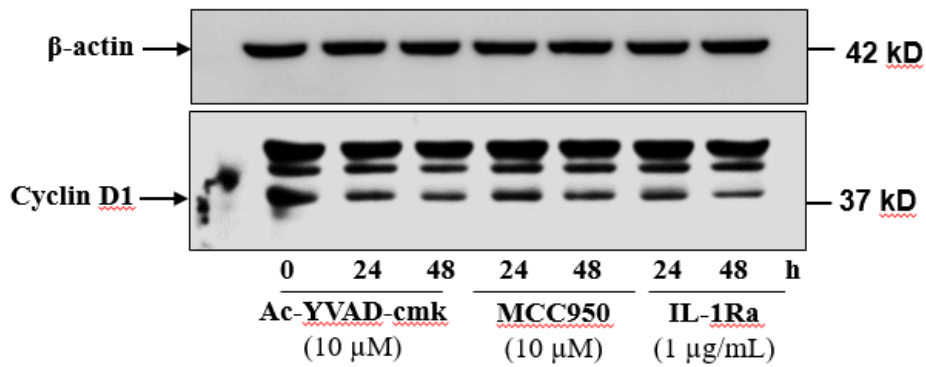

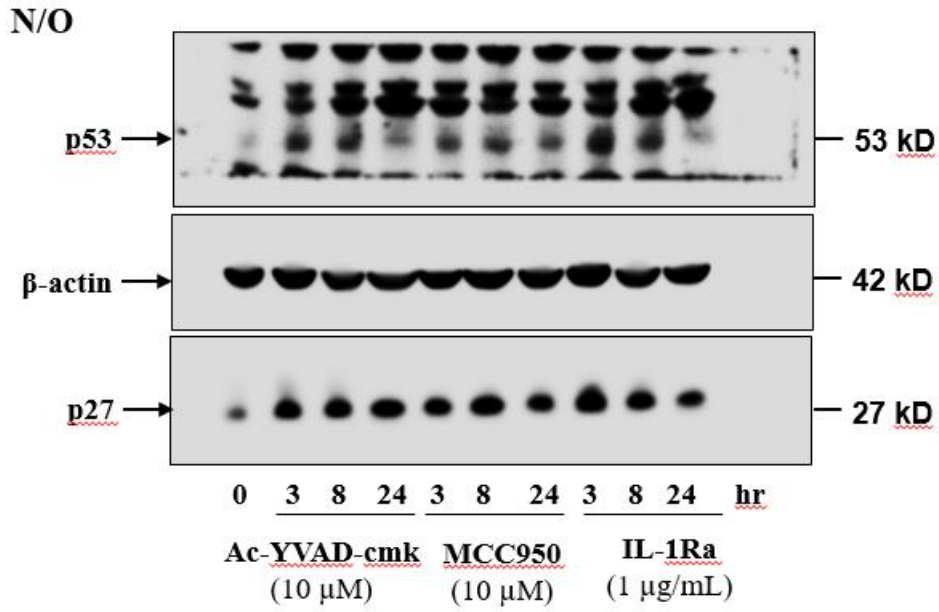

Whole Western blots for Figure 6

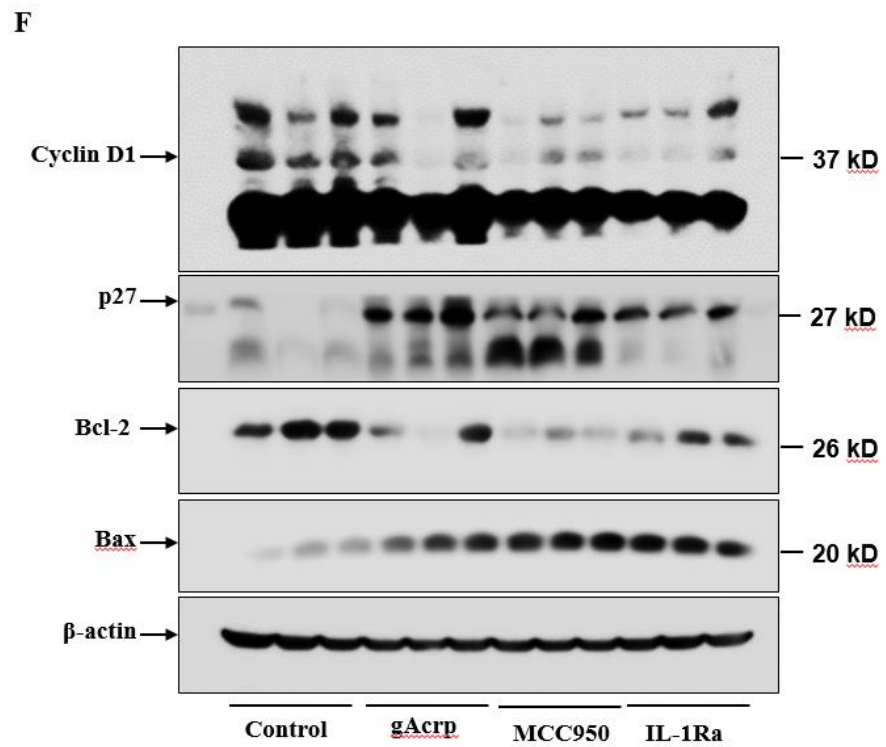

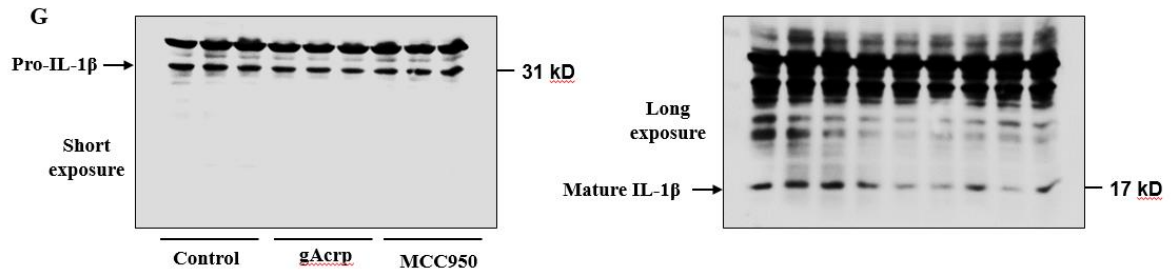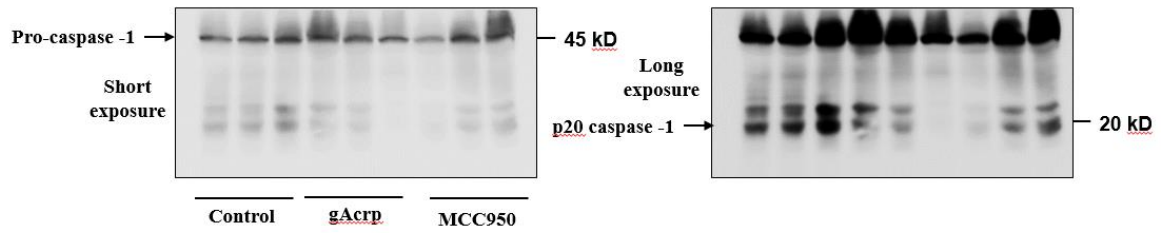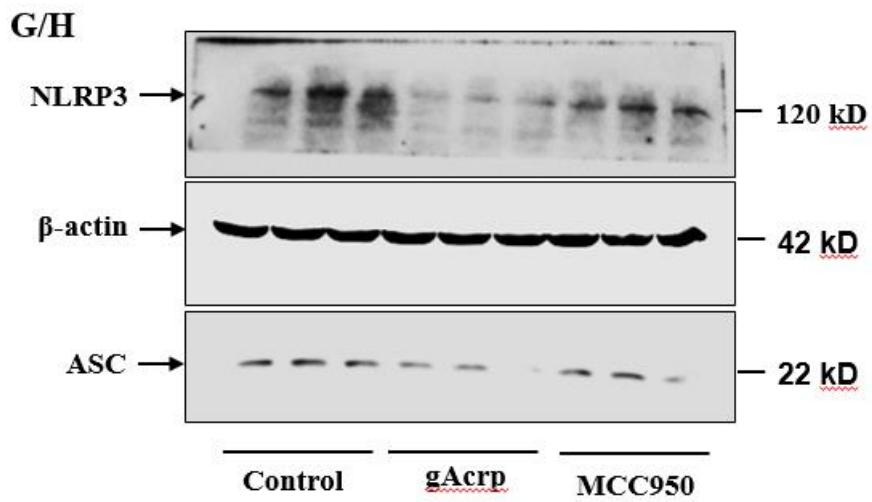



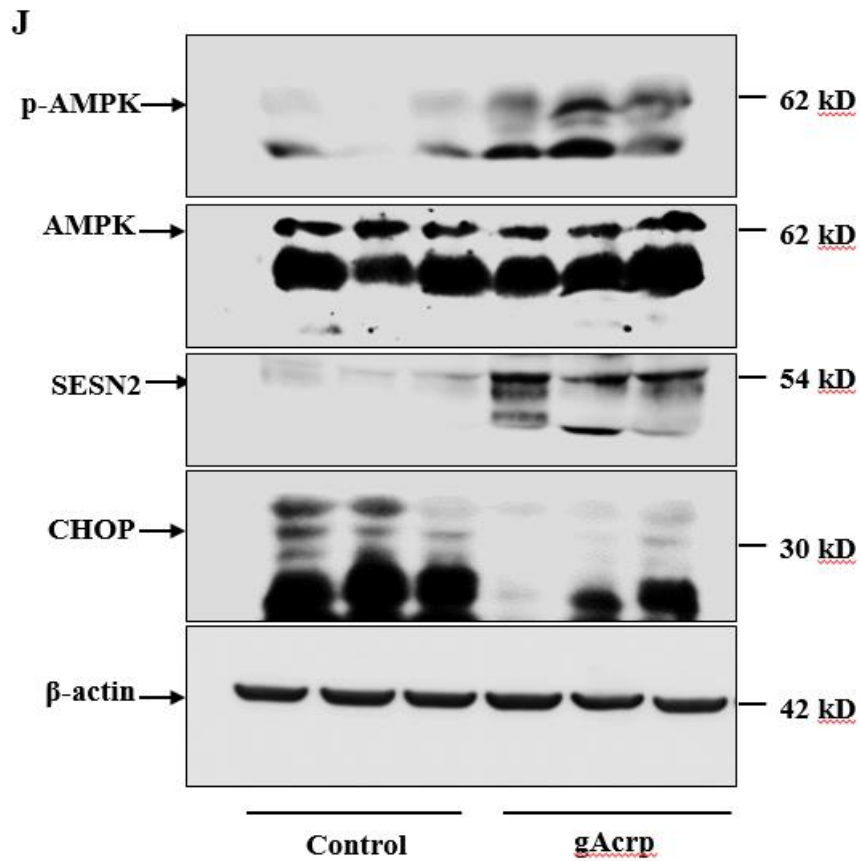

**Figure S3.** Blots from Western blot analysis.

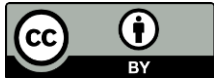

© 2020 by the authors. Licensee MDPI, Basel, Switzerland. This article is an open access article distributed under the terms and conditions of the Creative Commons Attribution (CC BY) license (<http://creativecommons.org/licenses/by/4.0/>).
